# Supplementary material
Source: Springer Nature journal article supplement (https://www.springermedizin.de/resource/supplementary/12916_2010_367_MOESM3_ESM.pdf/9599800)

**rs882605**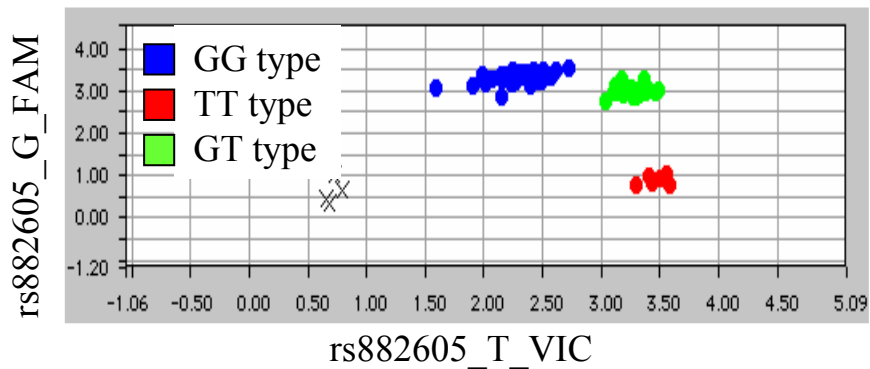**rs2246901**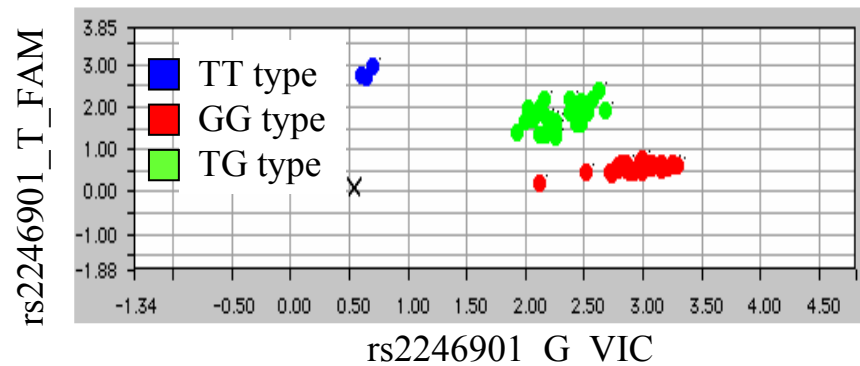**rs1104760**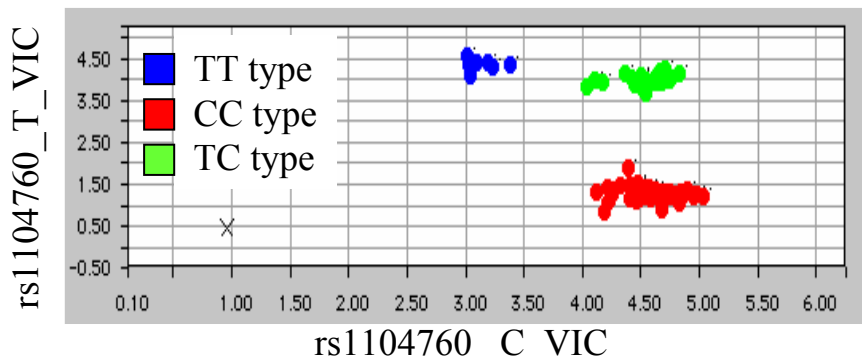**rs2258447**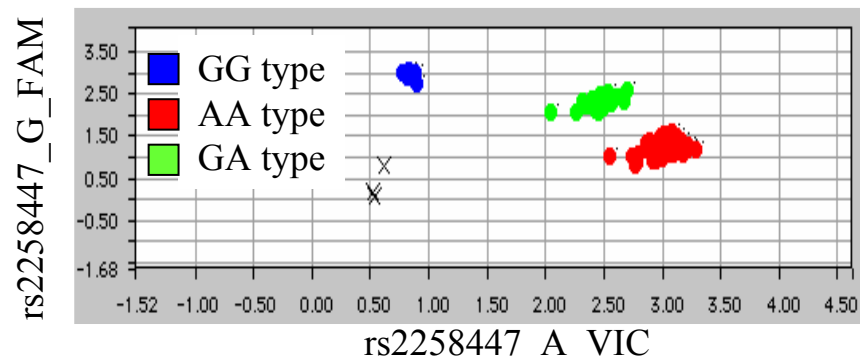**rs2688513**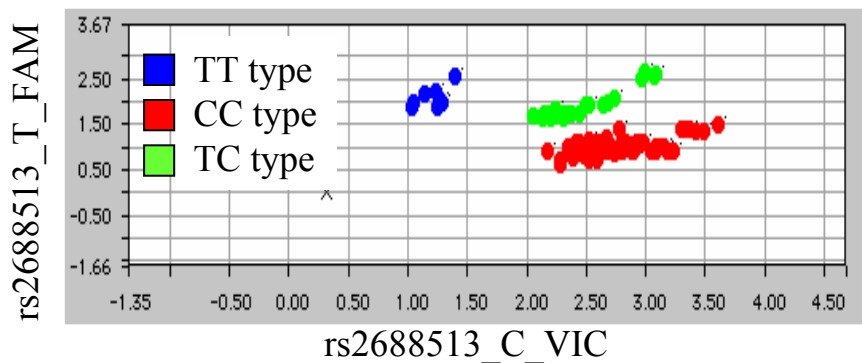**rs2291652**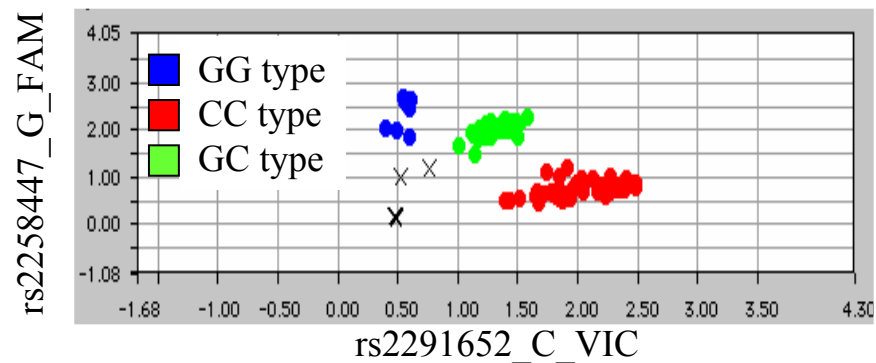

Supplement: MOESM3 [file 9599800]
